# Supplementary material for: Treatment policy change to dihydroartemisinin–piperaquine contributes to the reduction of adverse maternal and pregnancy outcomes
Source: Malar J. 2015 Jul 15;14:272. doi: 10.1186/s12936-015-0794-0 (PMC4501192; doi:10.1186/s12936-015-0794-0)
Supplement: Additional file 1: — Pregnant women form. [file 12936_2015_794_MOESM1_ESM.xls]

## Sheet: Pregnant
CLINICAL DETAILS				STUDY/CODE: MP________		LABORATORY DETAILS
Date of admission:					HRN: ________	THE MOTHER
Name:__________________________________
Address:________________________________							Date
Age:________					Tribe:_____________	Blood Film		Neg Pf Pv Pm Po P200:_______ P1000:______ G200:______
Place of Birth: Highland Lowland NonPapuan								Neg Pf Pv Pm Po P200:_______ P1000:______ G200:______
How long have you been in Timika?______________years						FBC		Hb:______ MCV:_____ Plt:_____ Hct:_____% WCC:_____
Reason for Admission:		Malaria	Delivery	Other:_____________________________		WCC		WCC:______ N:____% L:____%
Parity:______			Week of Pregnancy (approx):_________			ParaCheck		0 1+ 2+ 3+ 4+
Clinical Features						Other
History of Fever (48Hrs):				Y / N		PCR Spot Saved : Y / N			Slides Saved: Y / N
Febrile Illness During this Pregnancy				Y / N	How Many?_______	WB Saved :	Y / N		Placenta :	Y / N
If Yes What Month?__________			What treatment?______		Where? ________
ANC:	None	RSMM	Private doctors		Midwives Other:	THE BABY
HIV Status: + -- UK			Smoker	Y / N	How Many?_______		Date
Other Comorbidities:_________________				PPH : Y / N		Blood Film		Neg Pf Pv Pm Po P200:_______ P1000:______ G200:______
Markers of Severity (see RSMM List):________								Neg Pf Pv Pm Po P200:_______ P1000:______ G200:______
Temperature on Admission:_______				BP :	mmHg	FBC		Hb:______ MCV:_____ Plt:_____ Hct:_____% WCC:_____
Treatment:		1. Quinine 2. Chloroquine 3. SP 4. Other_______				Others:
Outcome:	Mother:	Alive	Died
	Pregnancy:	Delivery Miscarriage Stillbirth Neontal Death Ongoing Pregnancy				Slides Saved:			Y / N
IF Delivery…						WB Saved :			Y / N
Date of Delivery:__________			Placental Weight:_________ g			PCR Spot			Y / N
Birth weight1:______________			Birth weight2:______________
Name:____________________________________________						0. Not severe, 1. GCS < 11/15 Blantyre<2 / 5, 2. Hb<5g/dl,/Hct<15% ,
Dubowits score :______________			Gestational age:__________			3. Visible Jaundice and >100,000 parasites /ul, or Cr>1.5 4. Cr>3mg/dl +/- Urine Output <400ml day-1
Age When Examined (Hours):				Sex1: M / F		5. Plasma Glucose < 40mg/dl 6. Asexual Parasitaemia > 10%. 7. BPs <80mmHg and cool peripheries
Baby Symptoms:				Sex2: M / F		8. Blackwater fever 9. Acidosis HCO3<15
Fever	Restless	Unable To Suck		Other:________________________________________		10. Resp Insufficiency (central cyanosis or RR>32min or deep breathing in children) 11. Prostration
	Baby Code	MB
Date of Discharge From Hospital:____________________
